# Supplementary material for: Evidence of thickness-dependent surface-induced ferroelectricity in few-layer germanium sulfide obtained via scanning tunneling spectroscopy
Source: Royal Society of Chemistry journal article supplement (doi:10.1039/d3nr05566c), 2024-01-01
Supplement: d3nr05566c1.pdf [file d3nr05566c1.pdf]

Electronic Supplementary Information

**Evidence of Thickness-dependent Surface Induced Ferroelectricity in Few-layer Germanium Sulfide obtained via Scanning Tunneling Spectroscopy**

*Rafael R. Barreto<sup>a</sup>, Thiago C Ribeiro<sup>a</sup>, Gustavo H.R Soares<sup>a</sup>, Everton Pereira<sup>a</sup>, Douglas R. Miquita<sup>b</sup>, Gustavo A.M. Safar<sup>a</sup>, Mario S. C. Mazzoni<sup>a</sup>, Angelo Malachias<sup>a</sup>, Rogerio Magalhaes-Paniago<sup>a</sup>*

a. Physics Department, Federal University of Minas Gerais, Av. Pres. Antônio Carlos 6627, 31270-901, Belo Horizonte, MG Brazil  
[\\*rogerio.paniago0@gmail.com](mailto:*rogerio.paniago0@gmail.com)

b. Microscopic Center, Federal University of Minas Gerais, Belo Horizonte, MG, 31270-901, Brazil

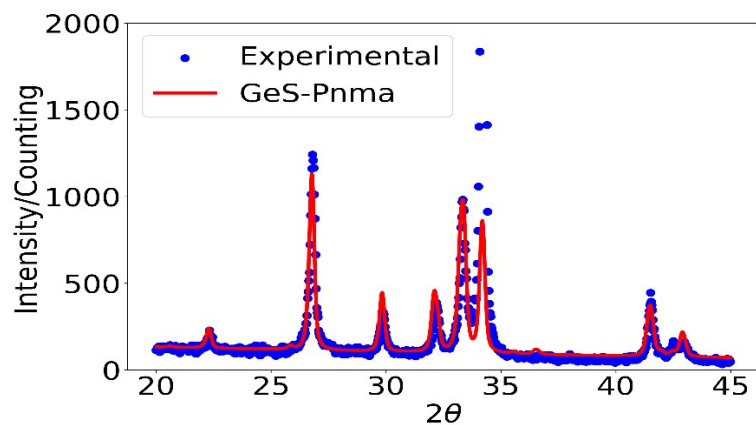

**Figure S1:** X-ray power diffraction pattern of our GeS sample. The blue dots are the experimental data and the red line is the fit using MAUD software for GeS Pnma phase.

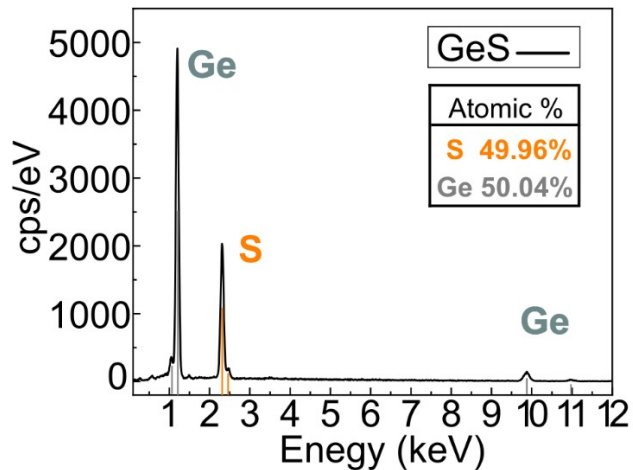

**Figure S2:** Energy dispersive spectroscopy of our GeS crystal.

| Element | Region 1 (%) | Region 2 (%) | Region 3 (%) | Region 4 (%) | Region 5 (%) | Region 6 (%) |
|---------|--------------|--------------|--------------|--------------|--------------|--------------|
| S       | 48.88        | 49.18        | 49.40        | 49.46        | 51.88        | 48.32        |
| Ge      | 50.95        | 49.49        | 50.18        | 50.54        | 49.04        | 49.68        |

**Table 1.** Atomic ratio of Germanium and Sulfur at different regions of the crystal, as obtained by Energy Dispersive Spectroscopy.

| Structure | Phase | hkl | Position ( $2\theta$ ) | Relative Intensity | Structure Factor |
|-----------|-------|-----|------------------------|--------------------|------------------|
| GeS       | Pnma  | 002 | 14.1                   | 9.4                | 20.7             |
| GeS       | Pnma  | 110 | 26.65                  | 35.5               | 78.8             |
| GeS       | Pnma  | 111 | 27.74                  | 40.4               | 87               |
| GeS       | Pnma  | 004 | 28.52                  | 100                | 139.5            |
| GeS       | Pnma  | 021 | 34.56                  | 15                 | 68.1             |
|           |       |     |                        |                    |                  |
| HOPG      | P63mc | 002 | 22.15                  | 100                | 17.3             |
| HOPG      | P63mc | 004 | 45.19                  | 7.2                | 10               |
|           |       |     |                        |                    |                  |
| Al        | Fm-3m | 111 | 31.86                  | 35.8               | 100              |
| Al        | Fm-3m | 200 | 37.02                  | 49                 | 34               |

**Table 2.** X-Ray experimental peaks relating the information of structure, phase, HKL indices, relative intensity and structure factor for GeS, HOPG and Aluminum. The relative intensities and structure factors for each structure were calculated individually.

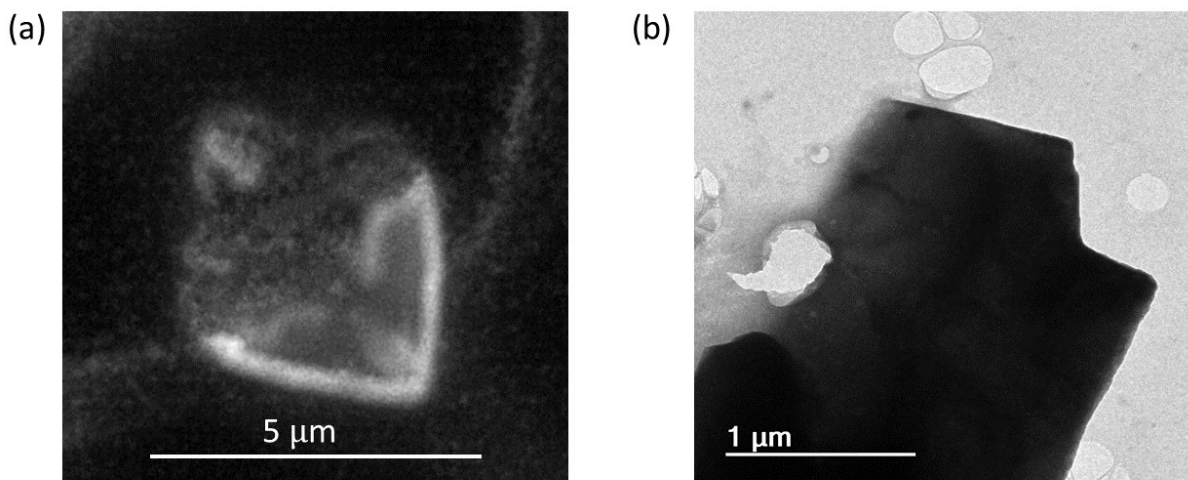

**Figure S3:** (a) Optical image of a GeS flake. (b) The low magnification image of the edge of a small GeS flake film fixed onto the carbon film on TEM grid.

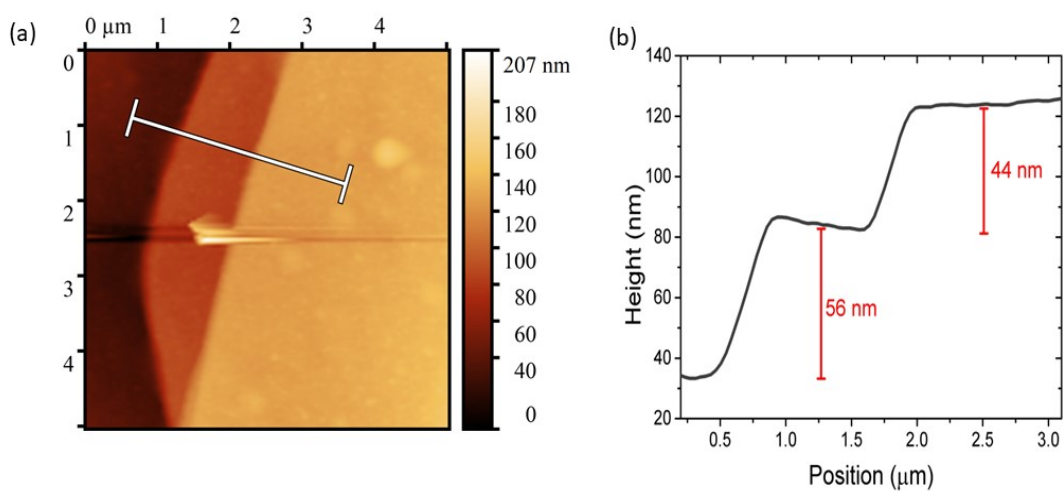

**Figure S4:** (a) STM image of stacked GeS flakes, with the parameters area = 5 μm x 5 μm,  $I_t = 800\text{pA}$  and  $V_{tip} = -2\text{V}$ . (b) Flake profile along the white line in (a) showing the height of the stacked flakes.

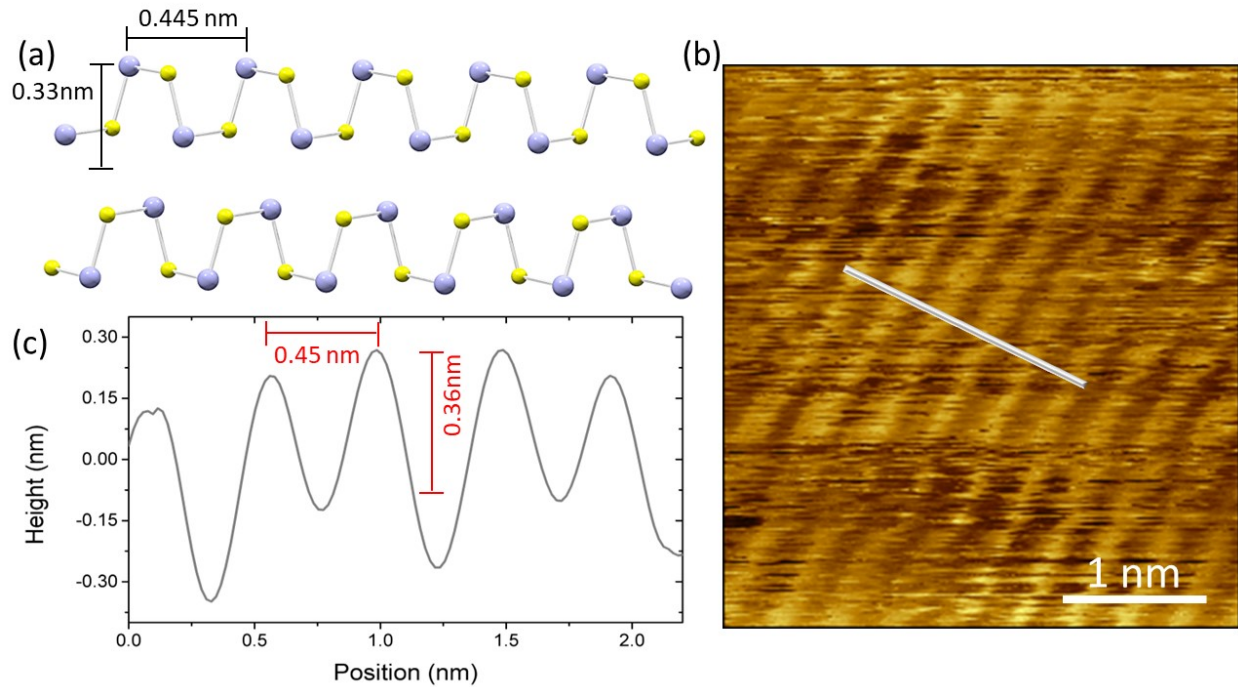

**Figure S5:** (a) Atomic structure of the GeS Pnma phase. (b) STM atomic resolution of our GeS sample. STM image with sensitivity to atomic stripes was taken using  $I_T = 500\text{pA}$  and  $V = 2\text{V}$ , with a measurement field of view of  $4\text{nm} \times 4\text{nm}$ . (c) Atomic topography profile obtained in (b).

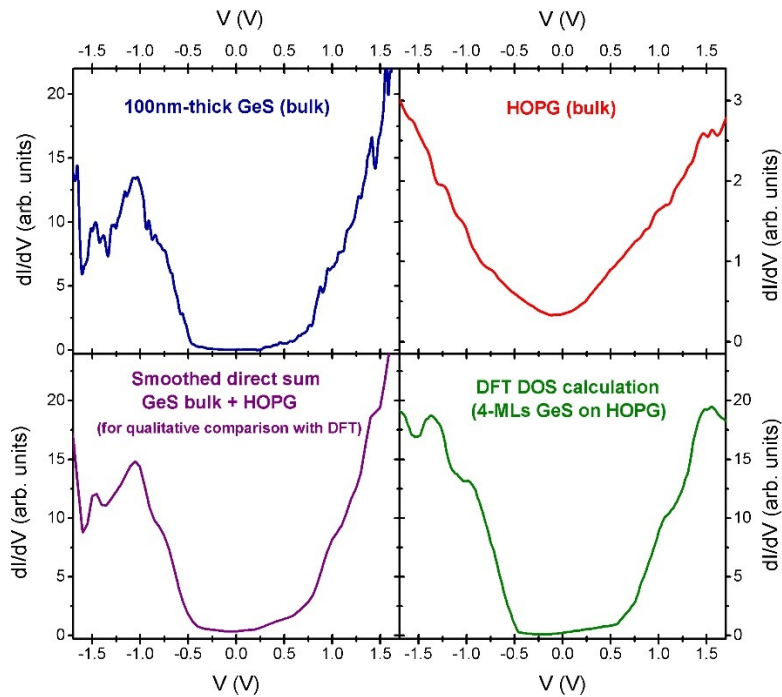

**Figure S6:** Comparison of scanning tunneling spectroscopy measurements of GeS (upper left), HOPG (upper right) and GeS flake on HOPG with a calculated density of states of 4 monolayers of GeS on HOPG (lower right).

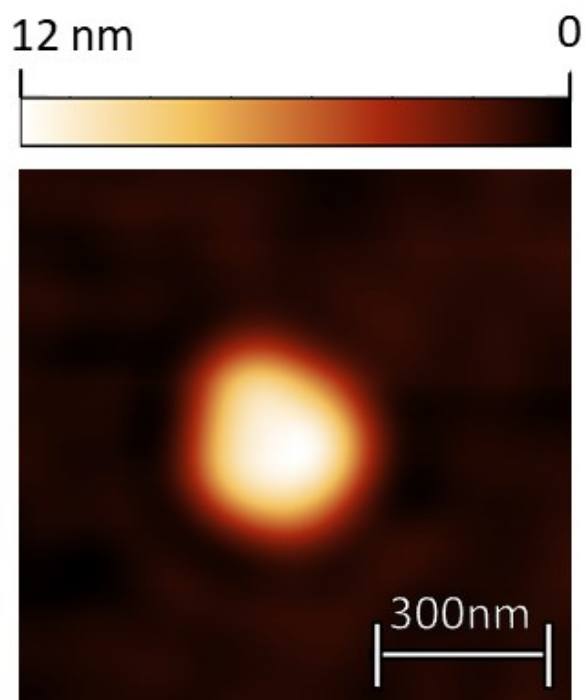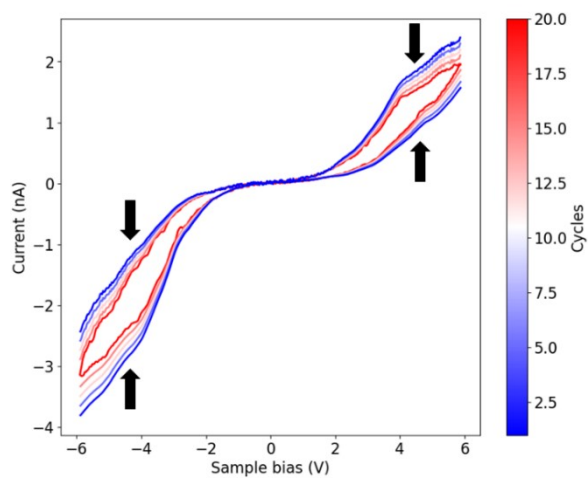

**Figure S8:** Germanium sulfide I-V curves for different cycles in the same spot at 2-nm thicker nanoflake. The color map is related to the number of cycles.

**Figure S7:** AFM image of the GeS nanoflake with 12nm height.

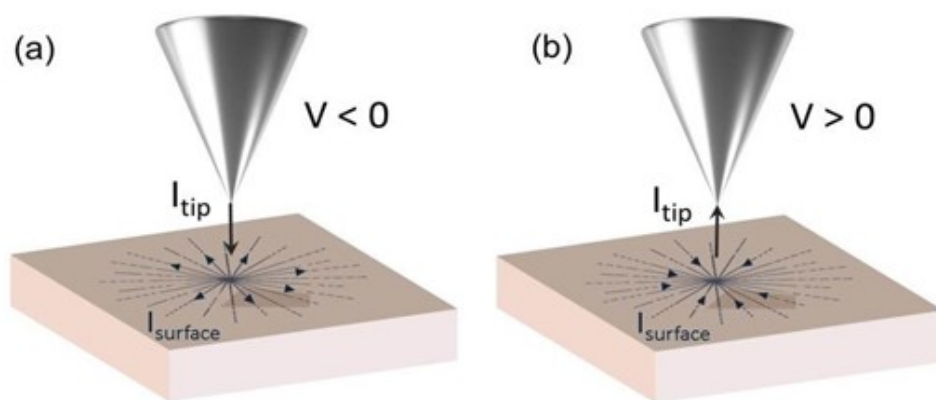

**Figure S9:** A schematic representation of the experiment, the resulting tunnelling and surface currents are shown in panels (a) for negative tip bias and (b) positive bias.
